# MethylStar: A fast and robust pre-processing pipeline for bulk or single-cell whole-genome bisulfite sequencing data

Yadollah Shahryary<sup>1,2</sup>, Rashmi R. Hazarika<sup>1,2</sup>, Frank Johannes<sup>1,2\*</sup>

\*Correspondence: [frank@johanneslab.org](mailto:frank@johanneslab.org)

## Author details

<sup>1</sup> Technical University of Munich, Department of Plant Sciences, Liesel-Beckmann-Str. 2, 85354 Freising, Germany.

<sup>2</sup> Technical University of Munich, Institute for Advanced Study (IAS), Lichtenbergstr. 2a, 85748 Garching, Germany.

## Abstract

**Background:** Whole-Genome Bisulfite Sequencing (WGBS) is a Next Generation Sequencing (NGS) technique for measuring DNA methylation at base resolution. Continuing drops in sequencing costs are beginning to enable high-throughput surveys of DNA methylation in large samples of individuals and/or single cells. These surveys can easily generate hundreds or even thousands of WGBS datasets in a single study. The efficient pre-processing of these large amounts of data poses major computational challenges and creates unnecessary bottlenecks for downstream analysis and biological interpretation.

**Results:** To offer an efficient analysis solution, we present MethylStar, a fast, stable and flexible pre-processing pipeline for WGBS data. MethylStar integrates well-established tools for read trimming, alignment and methylation state calling in a highly parallelized environment, manages computational resources and performs automatic error detection. MethylStar offers easy installation through a dockerized container with all preloaded dependencies and also features a user-friendly interface designed for experts/non-experts. Application of MethylStar to WGBS from human, maize and Arabidopsis shows that it outperforms existing pre-processing pipelines in terms of speed and memory requirements.

**Conclusions:** MethylStar is a fast, stable and flexible pipeline for high-throughput pre-processing of bulk or single-cell WGBS data. Its easy installation and user-friendly interface should make it a useful resource for the wider epigenomics community. MethylStar is distributed under GPL-3.0 license and source code is publicly available for download from github <https://github.com/jlab-code/MethylStar> . Installation through a docker image is available from <http://jlabdata.org/methylstar.tar.gz>

## Background

Whole-Genome Bisulfite Sequencing (WGBS) is a Next Generation Sequencing (NGS) technique for measuring DNA methylation at base resolution. As a result of continuing drops in sequencing costs, an increasing number of laboratories and international consortia (e.g. IHEC, SYSCID, BLUEPRINT, EpiDiverse, NIH ROADMAP, Arabidopsis 1001 Epigenomes, Genomes and physical Maps) are adopting WGBS as the method of choice to survey DNA methylation in large population samples or in collections of cell lines and tissue types, either in

bulk or at the single-cell level [1,2]. Such surveys can easily generate hundreds or even thou- 32  
sands of WGBS datasets in a single study. A broad array of software solutions for the down- 33  
stream analysis of bulk and single-cell WGBS data have been developed in recent years. These 34  
include tools for data normalization such as RnBeads [3], SWAN [4], ChAMP [5], detection 35  
of differentially methylated regions (DMRs) e.g. Methykit [6], DMRcaller [7], Methylypy [8], 36  
metilene [9], imputation of methylomes from bulk WGBS data e.g. METHimpute [10], as 37  
well as imputation of single-cell methylomes e.g. Melissa [11], deepCpG [12] and dropouts in 38  
single-cell data e.g. SCRABBLE [13]. 39

However, these downstream analysis tools are dependent on the output of a number of 40  
data pre-processing steps, such as quality control e.g. FastQC [14], QualiMap [15], NGS 41  
QC toolkit [16], de-multiplexing of sequence reads, adapter trimming e.g Trimmomatic [17], 42  
TrimGalore [18], Cutadapt [19], alignment of reads to a reference genome and generation 43  
of methylation calls e.g. BSseeker2 [20], BSseeker3 [21], Bismark [22], BSMMap [23], bwa- 44  
meth [24], BRAT-nova [25], BiSpark [26], WALT [27], segemehl [28]. From a computational 45  
standpoint, data pre-processing is by far the most time-consuming step in the entire bulk or 46  
single-cell WGBS analysis workflow(Fig.1). In an effort to help streamline the pre-processing 47  
of WGBS data several pipelines have been published in recent years. These include nf- 48  
core/methylseq [29], gemBS [30], Bicycle [31] and Methylypy, some of which are currently 49  
employed by several epigenetic consortia. gemBS, Bicycle and Methylypy integrate data pre- 50  
processing and analysis steps using their own custom trimming and/or alignment tools (see 51  
Table 3). By contrast, nf-core/methylseq implements well-established NGS tools, such as 52  
TrimGalore for read trimming and Bismark and bwa-meth/MethylDackel [24] for alignment. 53  
The nf-core framework is built using Nextflow [32], and aims to provide reproducible pipeline 54  
templates that can be easily adapted by both developers as well as experimentalists. Despite 55  
these efforts, the installation and execution of these pipelines is not trivial and often require 56  
substantial bioinformatic support. Moreover, managing the run times of these pipelines for 57  
large numbers of WGBS datasets (i.e. in the order of hundreds or thousands) relies on 58  
substantial manual input, such as launching of parallel jobs on a compute cluster and collecting 59  
output files from temporary folders. 60

In an attempt to address these issues, we have developed MethylStar, a fast, stable and 61  
flexible pre-processing pipeline for WGBS data. MethylStar integrates well-established NGS 62

tools for read trimming, alignment and methylation state calling in a highly parallelized environment, manages computational resources and performs automatic error detection. MethylStar offers easy installation through a dockerized container with all preloaded dependencies and also features a user-friendly interface designed for experts/non-experts. Application of MethylStar to WGBS from Human, maize and Arabidopsis shows that it outperforms existing pre-processing pipelines in terms of speed and memory requirements.

## Implementation

### Core pipeline NGS components

In its current implementation, MethylStar integrates processing of raw fastq reads for both single- and paired-end data with options for adapter trimming, quality control (fastQC) and removal of PCR duplicates (Bismark software suite). Read alignment and cytosine context extraction is performed with the Bismark software suite. Alignments can be performed for WGBS and Post Bisulfite Adapter tagging (PBAT) approaches for single-cell libraries. Bismark was chosen because it features one of the most sensitive aligners, resulting in comparatively high mapping efficiency, low mapping bias and good genomic coverage [33, 34]. Finally, cytosine-level methylation calls are (optionally) obtained with METHimpute, a Hidden Markov Model for inferring the methylation status/level of individual cytosines, even in the presence of low sequencing depth and/or missing data. All the different data processing steps have been optimized for speed and performance (see below), and can run on local machines as well as on larger compute nodes.

### Pipeline architecture, optimization of parallel processes and memory usage

The pipeline architecture comprises three main layers (Fig.1). The first layer is the interactive command-line user interface implemented in Python to simplify the process of configuring software settings and running MethylStar. Easy navigation through this interface allows non-experts to run large batches of samples without having to type commands at the terminal. The second layer consists of shell scripts, which handle low-level processes, efficiently coordinates the major software components and manages computational resources. The final layer is

implemented in R, and is used to call METHimpute and to generate output files that are compatible with a number of publicly available DMR-callers such as MethyKit, DMRcaller and bigWig files for visualization in Genome Browsers such as JBrowse [35]. All outputs are provided in standard data formats for downstream analysis.

All components/steps of the pipeline including adapter trimming, read alignment, removal of PCR duplicates and generation of cytosine calls have been parallelized using GNU Parallel [36] (Fig.1). The user can either set the number of parallel jobs manually for each pipeline component, or can opt to use the inbuilt parallel option. The inbuilt parallel implementation is available under the "Quick Run" option, which detects the number of parallel processes/jobs automatically for each pipeline component based on available system cores/threads and memory, thus allowing the user to run the entire steps of the pipeline in one go. In the parallel implementation of the Bismark alignment step, we include the genome size (in base pairs) as an additional factor while optimizing computational resources. For example, while running paired-end reads from *A. thaliana* with a genome size of  $\sim 135$  Mb on a system with 88 cores and 386 GB RAM we optimally set the number of jobs to 4. This setting allocates  $(4 \text{ jobs} \times 8 \text{ files/threads}) = 32$  threads to Bowtie2 and  $(4 \text{ jobs} \times 8 \text{ files/threads} \times 2) = 64$  threads to the bismark alignment tool (default no. of threads fixed to 8 in the internal bismark parallel argument). In this way, the maximum number of threads never exceeds the total number of available cores, which in turn allows other jobs such as file compression, I/O operations to be performed simultaneously.

Under the "Quick Run" option we have parallelized R processes such as the extraction of methylation calls from BAM files (post PCR duplicates removal) by bypassing the Bismark methylation extractor step and by passing these calls directly onto METHimpute for imputation of missing cytosines (Fig.1). In the parallelization of R processes we allocate even fewer number of threads ( $= 3$  threads in our system with 88 cores and 386 GB RAM), as these processes (in our case extracting and sorting bam files) are resource hungry and tend to load all its objects into memory. This allows for faster processing times and efficient management of resources without crashing the entire parallel process. In addition, we have introduced checkpoints for each individual component of the pipeline so that a job can be resumed easily in the unlikely case of system failure or any kind of user interruption.

---

## Running MethylStar 120

The user can choose to run each pipeline component individually, and customize software 121  
settings at each step by editing the configuration file which is available as an option through 122  
the interactive command-line user interface. The user interface displays the available options 123  
as a list, and users can execute specific pipeline steps by simply typing the index of their 124  
choice. Some of the key configuration parameters include setting file paths to input and 125  
output data, as well as options for handling large batches of samples, conversions to required 126  
file formats and deletion of auxiliary files that were generated during intermediate analysis 127  
steps. Our interactive user interface aids in the fast execution of complex commands and will 128  
be particularly effective for users who are less familiar with command line scripting. As an 129  
alternative, MethylStar also features a "Quick Run option", which allows the user to run all 130  
pipeline steps in one go using default configuration settings (Fig.1). 131

## Installation and documentation 132

MethylStar can be easily installed via a Docker image. This includes all the softwares, libraries 133  
and packages within the container, and thus solves any dependency issues. Advanced users 134  
can edit the existing docker container and build their own image. 135

Detailed description about installation and running the pipeline is available at <https://github.com/jlab-code/MethylStar> 136  
137

## Results and Discussion 138

### Benchmarking of speed 139

To demonstrate MethylStar's performance we analyzed bulk WGBS data from a selection 140  
of 200 *A. thaliana* ecotypes (paired-end, 295GB,  $\sim 8.63\times$  depth, 85.66% genome coverage, 141  
GSE54292), 75 maize strains (paired-end, 209GB,  $\sim 0.36\times$  depth,  $\sim 22.12\%$  genome coverage, 142  
GSE39232) and 88 Human H1 cell lines (single-end, 82GB,  $\sim 0.12\times$  depth,  $\sim 10.62\%$  genome 143  
coverage, GSM429321). MethylStar was compared with Methylypy, nf-core/methylseq and 144  
gemBS. All pipelines were run with default parameters on a computing cluster with a total 145  
of 88 cores (CPU 2.2 GHz with 378 GB RAM). Speed performance was assessed for a series 146

of batch sizes (*A. thaliana*: 50, 100, 150, 200 samples; human H1 cell line: 22, 44, 66, 88 147  
samples; maize: 15, 30, 45, 60, 75 samples) and was restricted to a fixed number of jobs 148  
(=32), see Fig. 2A-C. Although gemBS achieved the fastest processing times for the *A.* 149  
*thaliana* samples, MethylStar clearly outperformed the other pipelines when applied to the 150  
more complex genomes of maize and human, which are computationally more expansive and 151  
resource-demanding (Fig. 2B-C). For instance, for 88 human WGBS samples (82GB of data), 152  
MethylStar showed a 75.61% reduction in processing time relative to gemBS, the second 153  
fastest pipeline (909 mins vs. 3727 mins). Extrapolating from these numbers, we expect that 154  
for 1000 human WGBS samples, MethylStar could save about  $\sim 22.24$  days of run time ( $4\times$  155  
faster). To show that MethylStar can also be applied to single-cell WGBS data, we analyzed 156  
DNA methylation of 200 single cells from human early embryo tissue (paired-end, 845GB, 157  
 $\sim 0.38\times$  depth,  $\sim 9.97\%$  genome coverage, GSE81233) split into batches of 100 and 200, see 158  
Fig. 2D. MethylStar's processing times increased linearly with batch size (i.e. number of 159  
cells). For 200 cells, MethylStar required only 4227 mins, thus making it an efficient analysis 160  
solution for deep single-cell WGBS experiments. 161

## Memory usage statistics 162

Along with benchmarking of speed, we also evaluated the performance of the MethylStar, 163  
gemBS, nf-core/methylseq and Methylpy pipelines in terms of system memory utilization us- 164  
ing the MemoryProfiler [37] python module (Fig. 2E). We assessed the CPU time versus 165  
peak/max memory of all the 4 pipelines (default settings) on a computing cluster (specifi- 166  
cations above). For 10 random samples from the above *A. thaliana* benchmarking dataset 167  
(paired-end, 16GB, GSE54292) MethylStar and Methylpy showed the best balance between 168  
peak memory usage ( $\sim 12000$  MB and  $\sim 15000$  MB, respectively) and total run time ( $\sim 100$  169  
mins and 167 mins, respectively). In contrast, nf-core/Methylseq and GemBS exhibited strong 170  
trade-offs between memory usage and speed, with nf-core/Methylseq showing the lowest peak 171  
memory usage ( $\sim 700$  MB) but the longest CPU time ( $\sim 697$  mins), and GemBS the highest 172  
peak memory usage ( $\sim 21000$  MB) but the shortest run time ( $\sim 42$  mins) (Fig. 2E). Further- 173  
more, we inspected the time taken by each individual component of MethylStar. Bismark 174  
alignment was the most time consuming step of the pipeline but required the lowest peak 175

memory usage ( $\sim 1100\text{MB}$ ) of all the steps, indicating that our parallel implementation of the Bismark alignment step can be very effective in handling large numbers of read alignments with low memory requirements (Fig. 2F). We further benchmarked memory usage using 10 random samples from the above maize dataset (paired-end, 23GB, GSE39232). For this analysis, we focused on gemBS and MethylStar due to their shorter processing times for these datasets as compared to nf-core/Methylseq and Methylypy. For these maize dataset, gemBS's peak memory usage was  $\sim 110000$  MB as compared to  $\sim 81000$  MB for MethylStar ( $\sim 1.3$  times less memory) with a total run time of 667 mins and 421 mins, respectively. Taken together, these benchmarking results clearly show that MethylStar exhibits favorable performance in terms of processing time and memory, and that it is therefore an efficient solution for the pre-processing of large numbers of samples even on a computing cluster with limited resources.

## Conclusion

MethylStar is a fast, stable and flexible pipeline for the high-throughput analysis of bulk or single-cell WGBS data. Its easy installation and user-friendly interface should make it a useful resource for the wider epigenomics community.

## Funding

FJ and YS acknowledge support from the SFB/Sonderforschungsbereich924 of the Deutsche Forschungsgemeinschaft (DFG). FJ and RRH acknowledge support from the Technical University of Munich-Institute for Advanced Study funded by the German Excellent Initiative and the European Seventh Framework Programme under grant agreement no. 29176

## References

1. Chongyuan Luo, Christopher L. Keown, Laurie Kurihara, Jingtian Zhou, Yupeng He, Junhao Li, Rosa Castanon, Jacinta Lucero, Joseph R. Nery, Justin P. Sandoval, Brian Bui, Terrence J. Sejnowski, Timothy T. Harkins, Eran A. Mukamel, M. Margarita Behrens, and Joseph R. Ecker. Single-cell methylomes identify neuronal subtypes and regulatory elements in mammalian cortex. *Science (New York, N.Y.)*, 357(6351):600–604, August 2017.



2. Ping Zhu, Hongshan Guo, Yixin Ren, Yu Hou, Ji Dong, Rong Li, Ying Lian, Xiaoying Fan, Boqiang Hu, Yun Gao, Xiaoye Wang, Yuan Wei, Ping Liu, Jie Yan, Xiulian Ren, Peng Yuan, Yifeng Yuan, Zhiqiang Yan, Lu Wen, Liying Yan, Jie Qiao, and Fuchou Tang. Single-cell dna methylome sequencing of human preimplantation embryos. *Nature Genetics*, 50(1):12–19, January 2018. 204–208
3. Fabian Müller, Michael Scherer, Yassen Assenov, Pavlo Lutsik, Jörn Walter, Thomas Lengauer, and Christoph Bock. Rnbeads 2.0: comprehensive analysis of dna methylation data. *Genome biology*, 20(1):55, 2019. 209–211
4. Jovana Maksimovic, Lavinia Gordon, and Alicia Oshlack. Swan: Subset-quantile within array normalization for illumina infinium humanmethylation450 beadchips. *Genome biology*, 13(6):R44, 2012. 212–214
5. Yuan Tian, Tiffany J Morris, Amy P Webster, Zhen Yang, Stephan Beck, Andrew Feber, and Andrew E Teschendorff. Champ: updated methylation analysis pipeline for illumina beadchips. *Bioinformatics*, 33(24):3982–3984, 2017. 215–217
6. Altuna Akalin, Matthias Kormaksson, Sheng Li, Francine E Garrett-Bakelman, Maria E Figueroa, Ari Melnick, and Christopher E Mason. methylkit: a comprehensive r package for the analysis of genome-wide dna methylation profiles. *Genome biology*, 13(10):R87, 2012. 218–221
7. Marco Catoni, Jonathan MF Tsang, Alessandro P Greco, and Nicolae Radu Zabet. Dmrcaller: a versatile r/bioconductor package for detection and visualization of differentially methylated regions in cpg and non-cpg contexts. *Nucleic acids research*, 46(19):e114–e114, 2018. 222–225
8. Matthew D. Schultz, Yupeng He, John W. Whitaker, Manoj Hariharan, Eran A. Mukamel, Danny Leung, Nisha Rajagopal, Joseph R. Nery, Mark A. Urich, Huaming Chen, Shin Lin, Yiing Lin, Inkyung Jung, Anthony D. Schmitt, Siddarth Selvaraj, Bing Ren, Terrence J. Sejnowski, Wei Wang, and Joseph R. Ecker. Human body epigenome maps reveal noncanonical dna methylation variation. *Nature*, 523(7559):212–216, July 2015. 226–231
9. Frank Jühling, Helene Kretzmer, Stephan H. Bernhart, Christian Otto, Peter F. Stadler, and Steve Hoffmann. metilene: fast and sensitive calling of differentially methylated regions from bisulfite sequencing data. *Genome research*, 26(2):256–262, 02 2016. 232–234
10. Aaron Taudt, David Roquis, Amaryllis Vidalis, René Wardenaar, Frank Johannes, and Maria Colomé-Tatché. Methimpute: imputation-guided construction of complete methylomes from wgbs data. *BMC Genomics*, 19(1):444, June 2018. 235–237
11. Chantriolnt-Andreas Kapourani and Guido Sanguinetti. Melissa: Bayesian clustering and imputation of single-cell methylomes. *Genome biology*, 20(1):61, 2019. 238–239
12. Christof Angermueller, Heather J Lee, Wolf Reik, and Oliver Stegle. Deepcpg: accurate prediction of single-cell dna methylation states using deep learning. *Genome biology*, 18(1):67, 2017. 240–242

- 
13. Tao Peng, Qin Zhu, Penghang Yin, and Kai Tan. Scrabble: single-cell rna-seq imputation constrained by bulk rna-seq data. *Genome biology*, 20(1):88, 2019. 243  
244
  14. Fastqc. <https://www.bioinformatics.babraham.ac.uk/projects/fastqc>. 245
  15. Konstantin Okonechnikov, Ana Conesa, and Fernando García-Alcalde. Qualimap 2: advanced multi-sample quality control for high-throughput sequencing data. *Bioinformatics (Oxford, England)*, 32(2):292–294, January 2016. 246  
247  
248
  16. Ravi K. Patel and Mukesh Jain. Ngs qc toolkit: A toolkit for quality control of next generation sequencing data. *PLOS ONE*, 7(2):1–7, 02 2012. 249  
250
  17. Anthony M Bolger, Marc Lohse, and Bjoern Usadel. Trimmomatic: a flexible trimmer for illumina sequence data. *Bioinformatics*, 30(15):2114–2120, 2014. 251  
252
  18. Trimgalore. <https://github.com/FelixKrueger/TrimGalore>. 253
  19. Marcel Martin. Cutadapt removes adapter sequences from high-throughput sequencing reads. *EMBnet. journal*, 17(1):10–12, 2011. 254  
255
  20. Weilong Guo, Petko Fizev, Weihong Yan, Shawn Cokus, Xueguang Sun, Michael Q Zhang, Pao-Yang Chen, and Matteo Pellegrini. Bs-seeker2: a versatile aligning pipeline for bisulfite sequencing data. *BMC genomics*, 14(1):774, 2013. 256  
257  
258
  21. Kevin Yu Yuan Huang, Yan-Jiun Huang, and Pao-Yang Chen. Bs-seeker3: ultrafast pipeline for bisulfite sequencing. *BMC bioinformatics*, 19(1):111, 2018. 259  
260
  22. Felix Krueger and Simon R. Andrews. Bismark: a flexible aligner and methylation caller for bisulfite-seq applications. *Bioinformatics (Oxford, England)*, 27(11):1571–1572, June 2011. 261  
262  
263
  23. Yuanxin Xi and Wei Li. Bsmapping: whole genome bisulfite sequence mapping program. *BMC bioinformatics*, 10(1):232, 2009. 264  
265
  24. Brent S Pedersen, Kenneth Eyring, Subhajyoti De, Ivana V Yang, and David A Schwartz. Fast and accurate alignment of long bisulfite-seq reads. *arXiv preprint arXiv:1401.1129*, 2014. 266  
267  
268
  25. Elena Y Harris, Rachid Ounit, and Stefano Lonardi. Brat-nova: fast and accurate mapping of bisulfite-treated reads. *Bioinformatics*, 32(17):2696–2698, 2016. 269  
270
  26. Seokjun Soe, Yoonjae Park, and Heejoon Chae. Bispark: a spark-based highly scalable aligner for bisulfite sequencing data. *BMC bioinformatics*, 19(1):1–9, 2018. 271  
272
  27. Haifeng Chen, Andrew D Smith, and Ting Chen. Walt: fast and accurate read mapping for bisulfite sequencing. *Bioinformatics*, 32(22):3507–3509, 2016. 273  
274
  28. Christian Otto, Peter F Stadler, and Steve Hoffmann. Lacking alignments? the next-generation sequencing mapper segemehl revisited. *Bioinformatics*, 30(13):1837–1843, 2014. 275  
276  
277

- 
29. Philip A Ewels, Alexander Peltzer, Sven Fillinger, Harshil Patel, Johannes Alneberg, 278  
Andreas Wilm, Maxime Ulysse Garcia, Paolo Di Tommaso, and Sven Nahnsen. The nf- 279  
core framework for community-curated bioinformatics pipelines. *Nature Biotechnology*, 280  
pages 1–3, 2020. 281
30. Angelika Merkel, Marcos Fernández-Callejo, Eloi Casals, Santiago Marco-Sola, Ronald 282  
Schuyler, Ivo G Gut, and Simon C Heath. gemBS: high throughput processing for DNA 283  
methylation data from bisulfite sequencing. *Bioinformatics*, 35(5):737–742, 08 2018. 284
31. Osvaldo Graña, Hugo López-Fernández, Florentino Fdez-Riverola, David 285  
González Pisano, and Daniel Glez-Peña. Bicycle: a bioinformatics pipeline to 286  
analyze bisulfite sequencing data. *Bioinformatics*, 34(8):1414–1415, 12 2017. 287
32. Paolo Di Tommaso, Maria Chatzou, Evan W Floden, Pablo Prieto Barja, Emilio 288  
Palumbo, and Cedric Notredame. Nextflow enables reproducible computational work- 289  
flows. *Nature biotechnology*, 35(4):316–319, 2017. 290
33. Aniruddha Chatterjee, Peter A. Stockwell, Euan J. Rodger, and Ian M. Morison. Com- 291  
parison of alignment software for genome-wide bisulphite sequence data. *Nucleic Acids* 292  
*Research*, 40(10):e79–e79, 02 2012. 293
34. Jimmy Omony, Thomas Nussbaumer, and Ruben Gutzat. Dna methylation analysis in 294  
plants: review of computational tools and future perspectives. *Briefings in Bioinfor-* 295  
*matics*, 2019. 296
35. Mitchell E. Skinner, Andrew V. Uzilov, Lincoln D. Stein, Christopher J. Mungall, 297  
and Ian H. Holmes. Jbrowse: a next-generation genome browser. *Genome research*, 298  
19(9):1630–1638, September 2009. 299
36. Gnu parallel. <https://www.gnu.org/software/parallel/>. 300
37. Memoryprofiler. [https://github.com/pythonprofilers/memory\\_profiler](https://github.com/pythonprofilers/memory_profiler). 301

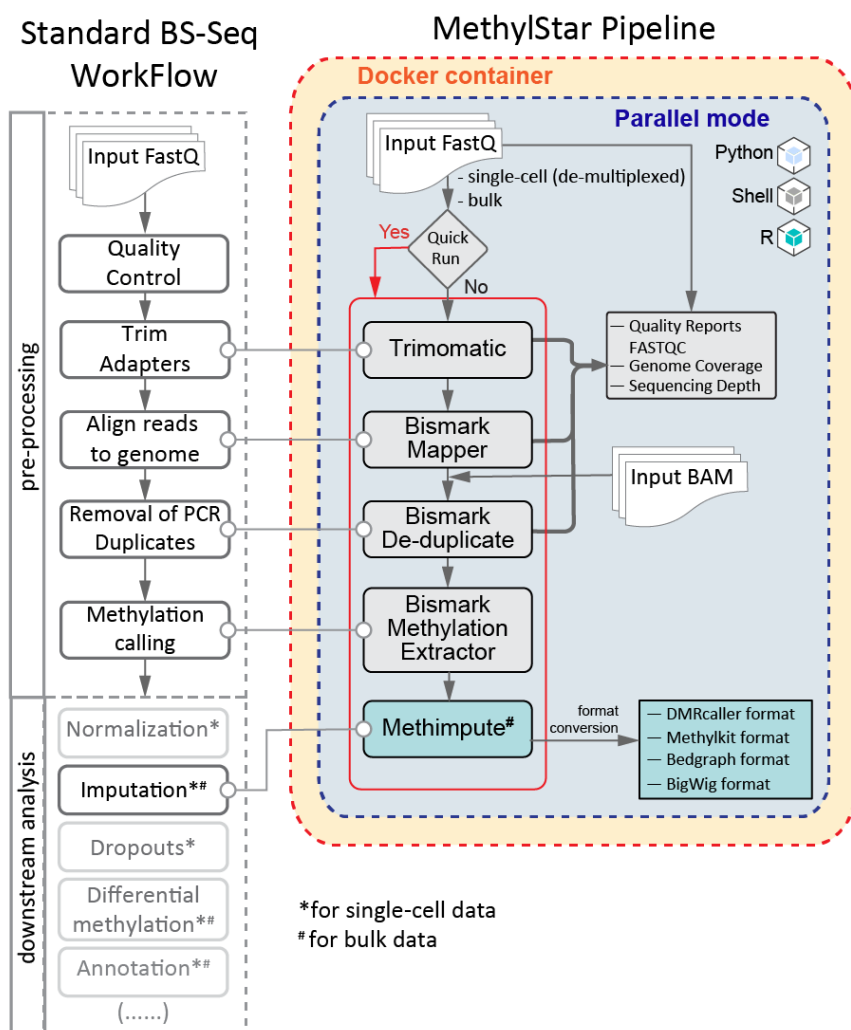

**Figure 1.** Basic workflow of MethylStar showing the pipeline architecture. The left panel shows a standard BS-Seq workflow and on the right are the different components of the MethylStar pipeline integrated as 3 different layers viz. Python, Shell and R. All steps of the pipeline have been parallelized using GNU parallel. MethylStar offers the option for "Quick run" (indicated in red) which runs all steps sequentially in one go or each component can be executed separately. MethylStar incorporates all pre-processing steps of a standard BS-Seq workflow and generates standard outputs that can be used for input into several downstream analysis tools.

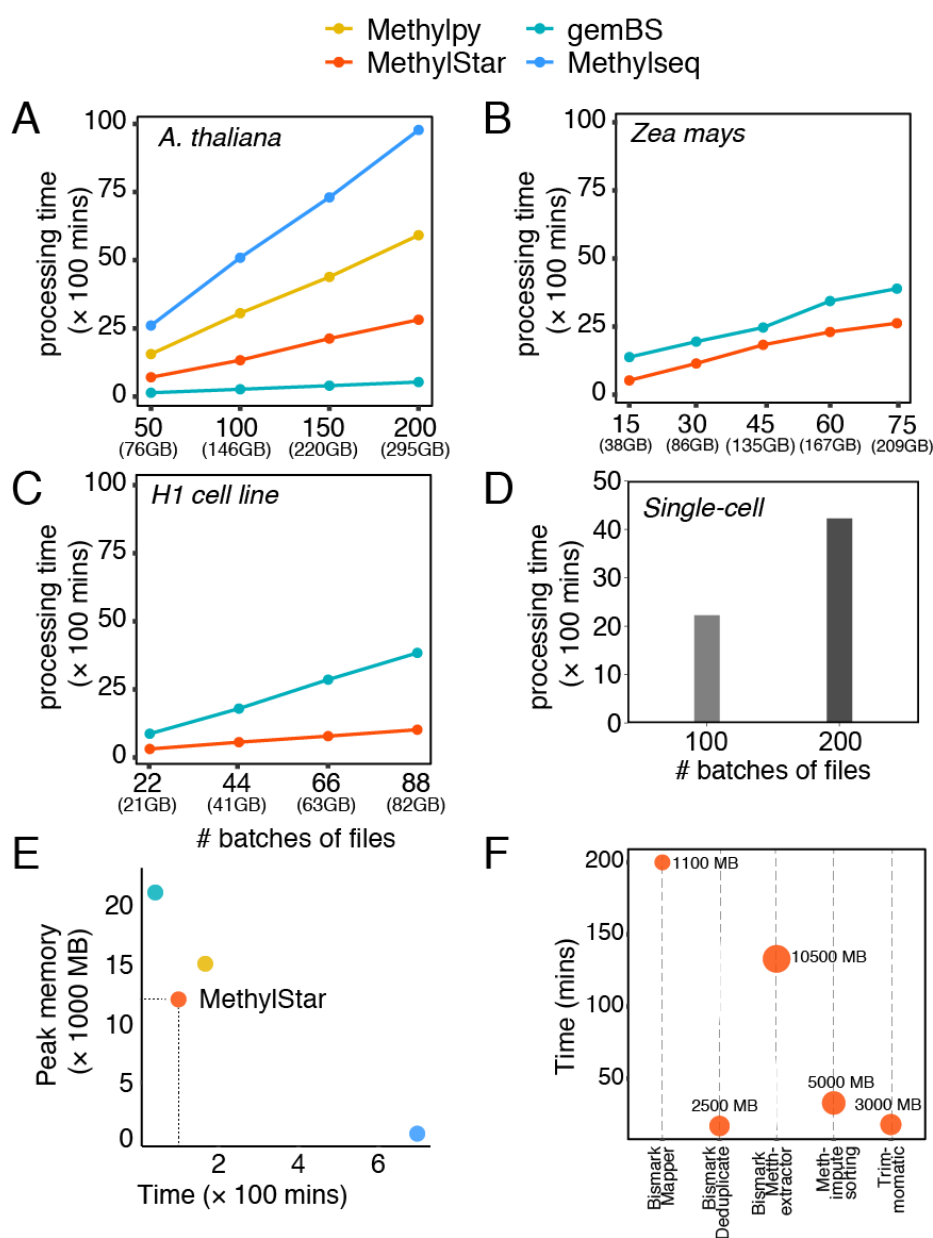

**Figure 2.** Performance of MethylStar as compared with other BS-Seq analysis pipelines viz. Methylpy, nf-core/methylseq and gemBS in (A) *A. thaliana* (B) maize (C) H1 cell line and (D) scBS-Seq samples. CPU processing time taken by METHimpute was not included in the current benchmarking process as there is no equivalent method in the other pipelines to compare with. Because of the very long run times observed for the *A. thaliana* data, Methylpy and Methylseq were no longer considered for benchmarking of speed in maize and H1 cell line samples. All pipelines were run using 32 jobs. (E) Peak memory usage as a function of time for 10 random *A. thaliana* samples. (F) Time taken by each component of MethylStar. X-axis shows the individual components of MethylStar and on the y-axis is the time in mins. The size of the dot indicates the peak memory usage by each component.

|                                        | MethylStar                                           | Methylpy                                      | nf-core/methylseq          | gemBS                | Bicycle                                  |
|----------------------------------------|------------------------------------------------------|-----------------------------------------------|----------------------------|----------------------|------------------------------------------|
| <b>Pipeline features</b>               |                                                      |                                               |                            |                      |                                          |
| Multi-threading                        | yes                                                  | yes                                           | yes                        | yes                  | yes                                      |
| programming language                   | Python, R                                            | Python                                        | Java                       | C, Python            | Java                                     |
| distribution                           | GitHub (GNU GPL3)                                    | GitHub, PyPI (Apache license)                 | GitHub (MIT license)       | GitHub (GNU GPL3)    | GitHub (GNU GPL3)                        |
| Installation & configuration           | Docker, install dependencies                         | pip install, install dependencies             | Docker, Singularity, Conda | Docker, Singularity  | Docker                                   |
| User-interface                         | yes                                                  | -                                             | -                          | -                    | -                                        |
| single-end/ paired-end                 | yes                                                  | yes                                           | yes                        | yes                  | yes                                      |
| Input data                             | WGBS, Single-cell (PBAT)                             | Single-cell, WGBS, single-cell NOMe-seq, PBAT | WGBS                       | RRBS, WGBS, PBAT     | WGBS                                     |
| <b>Pipeline steps</b>                  |                                                      |                                               |                            |                      |                                          |
| adapter trimming                       | Trimmomatic                                          | Cutadapt                                      | TrimGalore                 | Embedded within GEM3 | bicycle analyze-methylation              |
| alignment                              | Bismark                                              | bowtie/bowtie2                                | Bismark, bwa-meth          | GEM3                 | bicycle align/(bowtie/bowtie2)           |
| remove PCR duplicates                  | Bismark                                              | Picard                                        | Bismark, Picard            | Bscall               | bicycle analyze-methylation              |
| methylation calling                    | ProcessBismark, Aln (MethylKit), Bismark, METHimpute | yes                                           | Bismark, MethylDackel      | Bscall               | bicycle analyze-methylation, GATK        |
| imputation of missing cytosines        | METHimpute                                           | -                                             | -                          | -                    | -                                        |
| differential methylation (DMR) calling | -                                                    | yes                                           | -                          | -                    | bicycle analyze-differential-methylation |
| SNP calling                            | -                                                    | -                                             | -                          | Bscall               | -                                        |
| Alignment Quality Control              | Bismark                                              | -                                             | Qualimap                   | yes                  | yes                                      |
| summary reports                        | FastQC                                               | yes                                           | Bismark, MultiQC, Preseq   | yes                  | yes                                      |
| Methylation visualization              | bigWig, bedGraph                                     | bigWig                                        | -                          | bigWig, bedGraph     | bigWig                                   |

**Figure 3.** Table showing different features of MethylStar as compared to other BS-seq pipelines
